# Supplementary material for: Differential Tissue-Specific Jasmonic Acid, Salicylic Acid, and Abscisic Acid Dynamics in Sweet Cherry Development and Their Implications in Fruit-Microbe Interactions
Source: PubMed Central journal article supplement (PMC7884454; doi:10.3389/fpls.2021.640601), 2021-02-02
Supplement: Data_Sheet_1.pdf [file Data_Sheet_1.pdf]

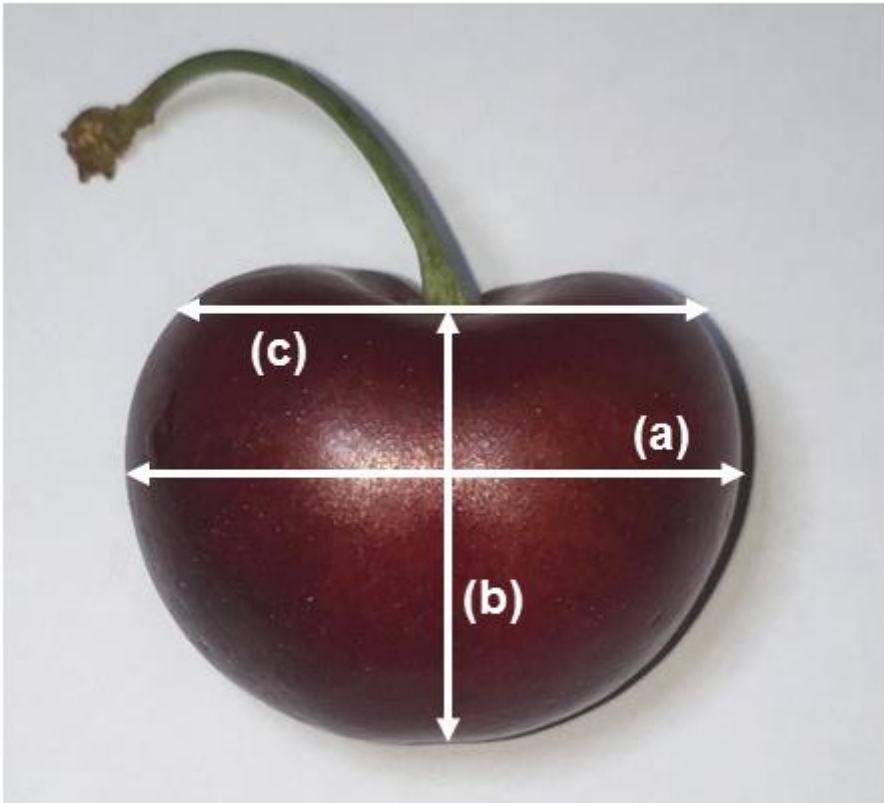

**Suppl. Fig. 1.** Fruit width (a), height from the apex to the base of the peduncle (b), and width at the top of the fruit (c) were used to estimate total fruit skin surface.

**Suppl. Table 1**

Morphological characterization of the most frequent epiphytic and endophytic microbial isolates from the exocarp and mesocarp of commercial orchard sweet cherry fruits. Microbial isolates from cracked cherries are also indicated.

| Isolate | Tissue source         | Microbial group | Colony characteristic |          |                         |             |                               |
|---------|-----------------------|-----------------|-----------------------|----------|-------------------------|-------------|-------------------------------|
|         |                       |                 | Shape                 | Margin   | Colour                  | Consistency | Other                         |
| Ep-1    | Exocarp               | Yeast           | Round                 | Entire   | Cream-Pink              | Butyrous    |                               |
| Ep-2    | Exocarp               | Yeast           | Round                 | Entire   | Pink-Red                | Mucoid      |                               |
|         | Mesocarp <sup>a</sup> |                 |                       |          |                         |             |                               |
| Ep-4    | Exocarp               | Bacteria        | Irregular             | Undulate | Yellow                  | Mucoid      | Bacterial morphology:<br>Rods |
| En-1    | Mesocarp              | Yeast           | Round                 | Entire   | White-Cream<br>Pink     | Butyrous    |                               |
| En-2    | Mesocarp <sup>a</sup> | Yeast           | Irregular             | Entire   | Off<br>White-<br>Yellow | Butyrous    |                               |

*Note:* morphological characterization was performed according to Krishnan et al. 2012.

<sup>a</sup> Isolates were found in the mesocarp of cracked cherries, but not in the mesocarp of healthy ones.
